# Supplementary material
Source: PubMed Central journal article supplement (PMC3318400)
Supplement: supp_80.4.1467_IAI6332-11_SF1.pdf [file supp_80.4.1467_IAI6332-11_SF1.pdf]

Supplemental Figure 1

Table 1. Accuracy of macrophage identification by LSC and a human operator

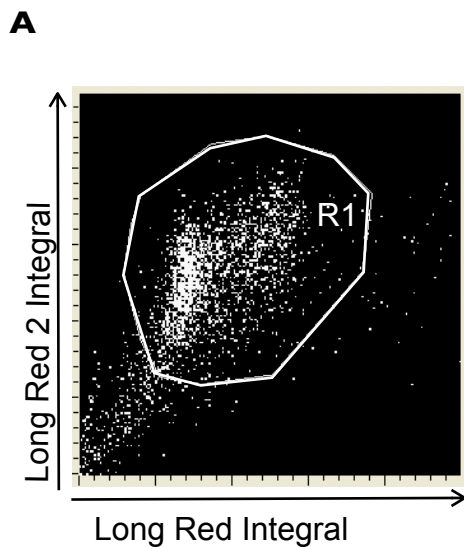

| Well #    | Macrophage Events |                       | R1 Macrophage |                       |
|-----------|-------------------|-----------------------|---------------|-----------------------|
|           | LSC               | Operator <sup>b</sup> | LSC           | Operator <sup>b</sup> |
| 1         | 100               | 89                    | 84            | 100                   |
| 2         | 100               | 78                    | 84            | 94                    |
| 3         | 100               | 96                    | 89            | 97                    |
| 4         | 100               | 97                    | 86            | 97                    |
| 5         | 100               | 95                    | 84            | 96                    |
| Mean ± SD |                   | 91 ± 7                | 85 ± 2        | 96 ± 2                |

<sup>a</sup>Count of cells present in each of the categories, as identified by LSC, for a total of 100 macrophages per well. <sup>b</sup> % accurate values, measured by human operator observing LSC images.

**B**

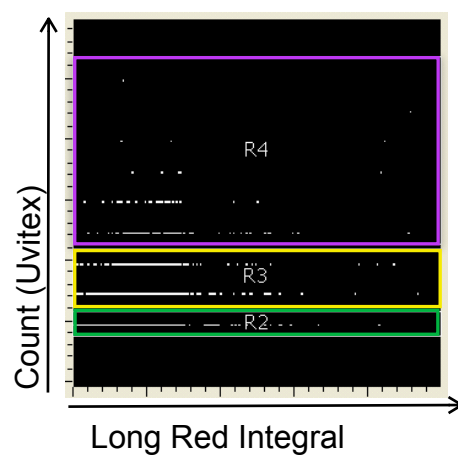

Table 2. Accuracy of number of ingested yeast cells by LSC and a human operator

| Well #    | No yeasts        |                      | 1 yeast          |                      | 2 yeasts         |                      | 1-2 Yeasts       |                      | >3 Yeasts        |                      |         |
|-----------|------------------|----------------------|------------------|----------------------|------------------|----------------------|------------------|----------------------|------------------|----------------------|---------|
|           | LSC <sup>a</sup> | Correct <sup>b</sup> |         |
| 1         | 40               | 93                   | 21               | 90                   | 6                | 50                   | 27               | 81                   | 5                | 80                   |         |
| 2         | 36               | 94                   | 21               | 76                   | 2                | 50                   | 23               | 96                   | 8                | 75                   |         |
| 3         | 32               | 97                   | 25               | 96                   | 17               | 100                  | 42               | 95                   | 3                | 100                  |         |
| 4         | 27               | 93                   | 24               | 92                   | 13               | 77                   | 37               | 86                   | 5                | 60                   |         |
| 5         | 21               | 86                   | 22               | 86                   | 13               | 85                   | 35               | 91                   | 8                | 100                  |         |
| Mean ± SD |                  | 31 ± 7               | 92 ± 4           | 23 ± 2               | 88 ± 8           | 10 ± 6               | 72 ± 21          | 33 ± 8               | 90 ± 6           | 6 ± 2                | 83 ± 17 |

<sup>a</sup>Count of cells present in each of the categories, as identified by LSC, for a total of 100 macrophages per well. <sup>b</sup> % accurate values, measured by human operator observing LSC images.

Supplemental Figure 1. **Accuracy of LSC identification.**

A) Macrophage Identification. Scatter plot of Macrophage events leads to definition of a region (in analogy to Flow Cytometry) where the majority of macrophages will be located. Counts are displayed in Table 1. B) Fungal Burden Quantification. Number of Uvitex events inside each macrophage were divided into categories and translated into color coded boxes: Zero Yeasts, Green; One or Two Yeasts, Yellow and More than Three, Magenta, allowing verification of software identification. Counts are displayed in Table 2. LSC could distinguish up to 10 yeasts cells ingested by a macrophage cell but for our experimental conditions definition of 2 categories was sufficient.
